# Supplementary material for: Non-caveolar caveolin-1 expression in prostate cancer cells promotes lymphangiogenesis
Source: PubMed Central journal article supplement (PMC4549361; doi:10.18632/oncoscience.180), 2015-08-03
Supplement: oncoscience-02-635-s001.pdf [file oncoscience-02-635-s001.pdf]

# Non-caveolar caveolin-1 expression in prostate cancer cells promotes lymphangiogenesis

## Supplementary Materials

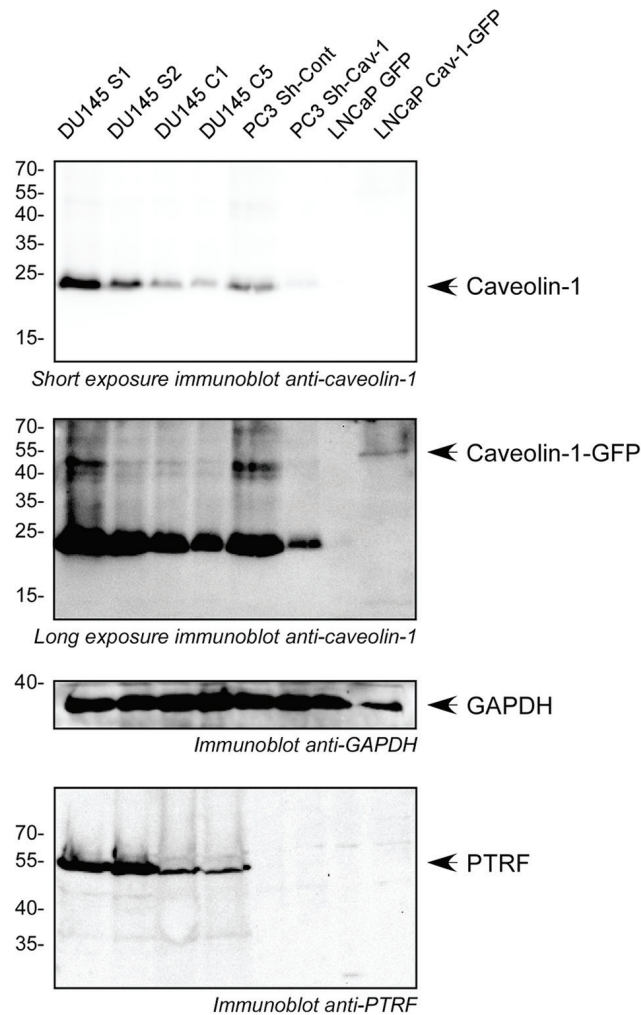

**Supplementary Figure 1: Characterization of Cav-1 and PTRF expression in prostate cancer cell lines.** Cell lysates from prostate cancer cells were separated by SDS-PAGE and analysed by immunoblotting with anti-caveolin-1 anti-PTRF or anti GAPDH antibody as indicated. All cell lines on the same blots are shown, with caveolin-1 at long or short exposure.
